# Supplementary material for: Distinct stores and the routing of water in the deep critical zone of a snow-dominated volcanic catchment
Source: Copernicus journal article supplement (doi:10.5194/hess-23-4661-2019), 2019-11-18
Supplement: Supplementary file 1 [file hess-23-4661-2019-supplement.pdf]

Supplement of Hydrol. Earth Syst. Sci., 23, 4661–4683, 2019  
<https://doi.org/10.5194/hess-23-4661-2019-supplement>  
© Author(s) 2019. This work is distributed under  
the Creative Commons Attribution 4.0 License.

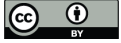

*Supplement of*

## **Distinct stores and the routing of water in the deep critical zone of a snow-dominated volcanic catchment**

**Alissa White et al.**

*Correspondence to:* Alissa White ([alissawhite@email.arizona.edu](mailto:alissawhite@email.arizona.edu))

The copyright of individual parts of the supplement might differ from the CC BY 4.0 License.

| Well ID | Well Casing Diameter [cm] | Annulus Diameter [cm] | Screened Interval Depth [mbgs] | Vibrating Wire Piezometer (VWP) or Transducer (T) Depth [mbgs] | Total Depth [mbgs] |
|---------|---------------------------|-----------------------|--------------------------------|----------------------------------------------------------------|--------------------|
| 1A      | 2.54                      | 9.6                   | 38.7 to 41.7                   | VWP @ 41.5                                                     | 41.7               |
| 1B      | 2.54                      | 9.6                   | 31.7 to 37.8                   | T @ 37.8                                                       | 37.8               |
| 2A      | 5.08                      | 9.6                   | 42.8 to 45.9                   | T @ 45.5                                                       | 47.15              |
| 2B      | 5.08                      | 9.6                   | 34.7 to 37.8                   | T @ 37.7                                                       | 39.1               |
| 2C      | 5.08                      | 9.6                   | 24.7 to 30.8                   | T @ 30.1                                                       | 30.85              |
| 2D      | 5.08                      | 9.6                   | 3.7 to 6.7                     | VWP @ 6.4                                                      | 6.7                |
| 3A      | 2.54                      | 9.6                   | 13.8 to 16.9                   | VWP @ 15.3                                                     | 16.85              |
| 3B      | 5.08                      | 9.6                   | 6.8 to 12.9                    | VWP @ 12.7                                                     | 12.93              |

- 1 **Table S1: Completed well dimensions. All screened intervals are 0.051 cm slotted intervals. It is important to**
- 2 **note that VWPs were installed during monitoring well installation while transducers were installed more than**
- 3 **one year after drilling; therefore, only VWPs cover the entire time range of this study.**

4

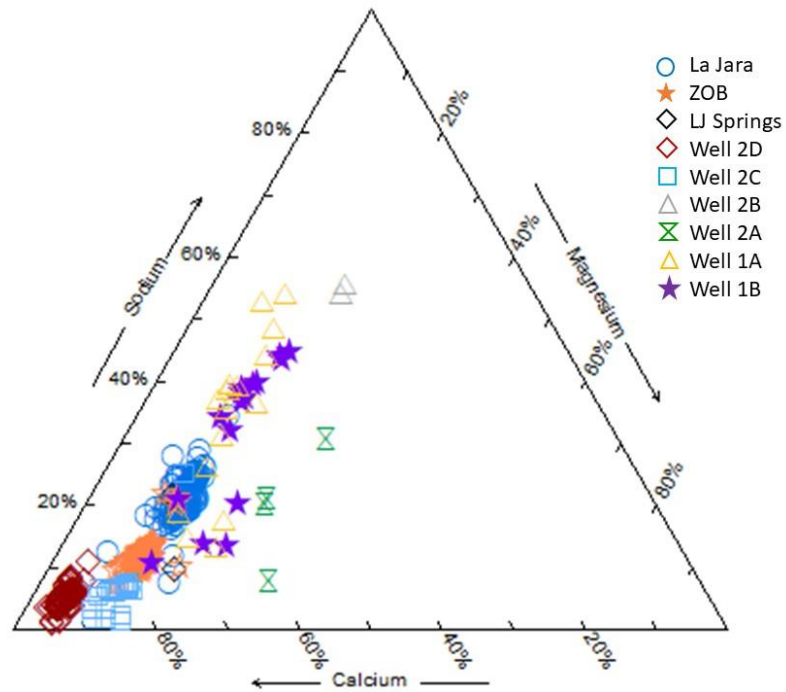

5

6 **Figure S1: Ternary diagram showing percent microequivalents of sodium, calcium, and magnesium. Shallow**  
7 **site two groundwaters are calcium dominant while deeper site two groundwater are more of a mix of calcium-**  
8 **sodium-magnesium and site one groundwaters have a larger range in composition dominated by calcium and**  
9 **sodium. Finally, surface waters from the La Jara flume and La Jara springs are calcium-sodium waters that**  
10 **plot in overlapping space with site one groundwaters and have generally slightly greater percentages of sodium**  
11 **and less percentages of calcium than ZOB surface waters which overlap in space with site one groundwaters**  
12 **and site 2C groundwaters.**

13

14

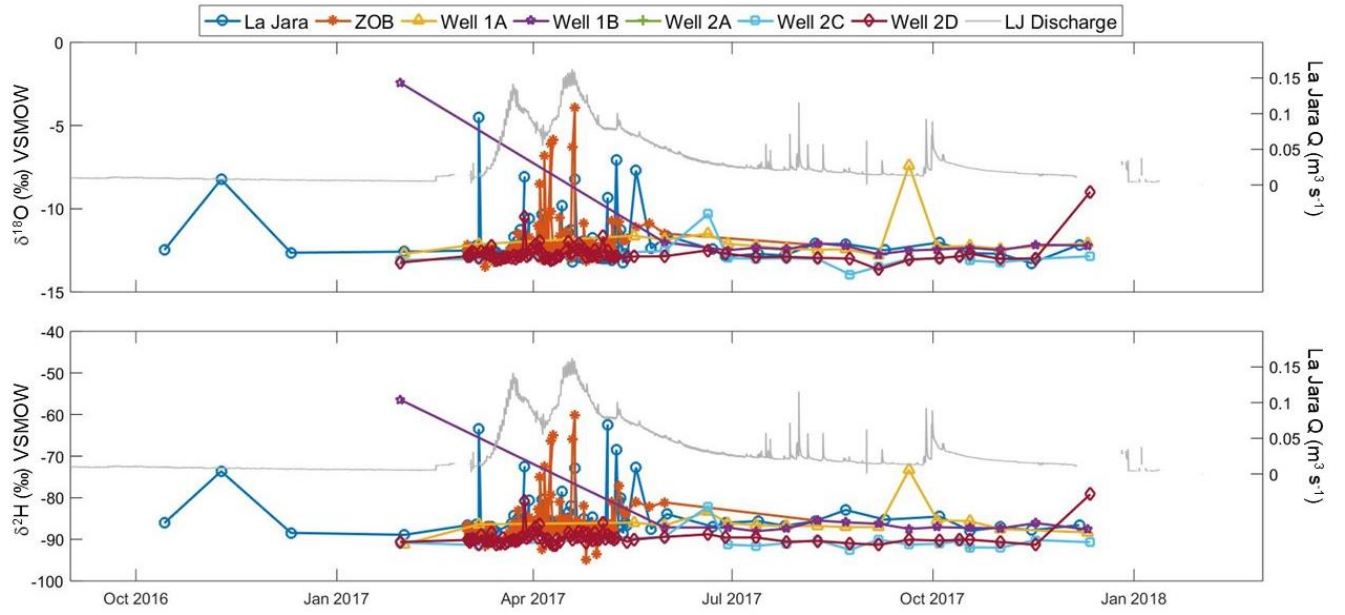

15  
16  
17  
18

**Figure S2: Time series of  $\delta^{18}\text{O}$  and  $\delta^2\text{H}$  surface waters and groundwaters plotted with La Jara discharge to indicate timing of shifts in stable water isotope values.**
